# Supplementary material for: Tiller Number1 encodes an ankyrin repeat protein that controls tillering in bread wheat
Source: PubMed Central journal article supplement (PMC9929037; doi:10.1038/s41467-023-36271-z), 2023-02-14
Supplement: 41467_2023_36271_MOESM1_ESM.pdf [file 41467_2023_36271_MOESM1_ESM.pdf]

***Tiller Number1* encodes an ankyrin repeat protein that controls  
tillering in bread wheat**

Dong and Zhang *et al.*

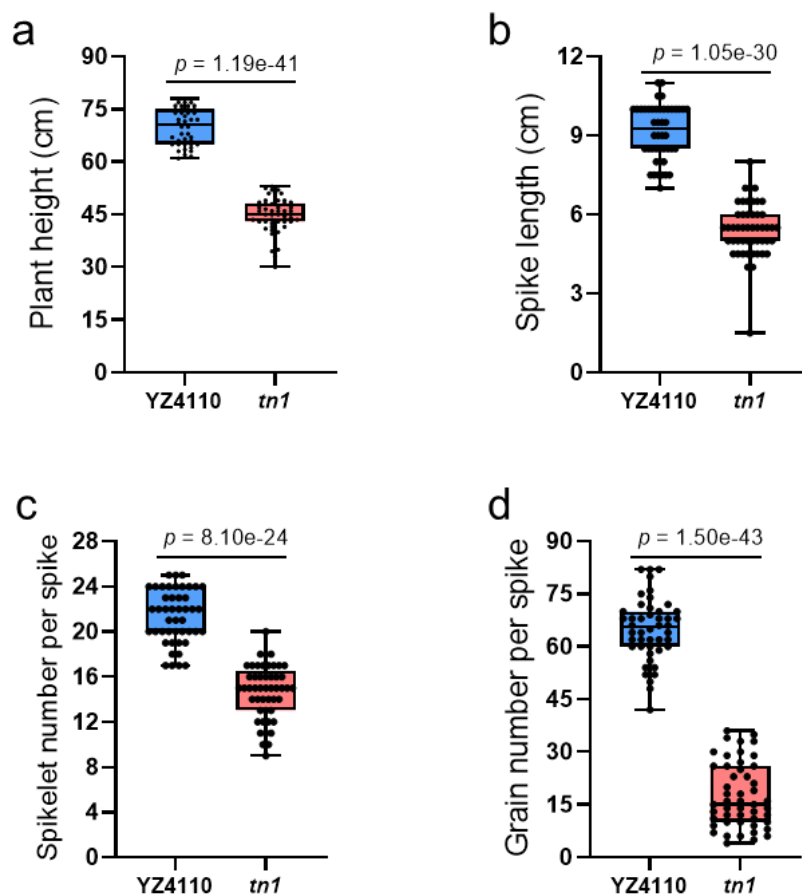

**Supplementary Fig. 1. Major agronomic traits in YZ4110 and the *tn1* mutant.**

**a–d**, Plant height (**a**), spike length (**b**), spikelet number per spike (**c**), and grain number per spike (**d**) of YZ4110 ( $n = 46$  biologically independent samples) and the *tn1* mutant ( $n = 49$  biologically independent samples). Data are means  $\pm$  SD, and  $p$  values are indicated by two-tailed unpaired  $t$ -test. The two whiskers of the box plot and the middle, upper, and lower box lines represent the maximum, minimum, median and two quartiles of values in each group. Source data are provided as a Source Data file.

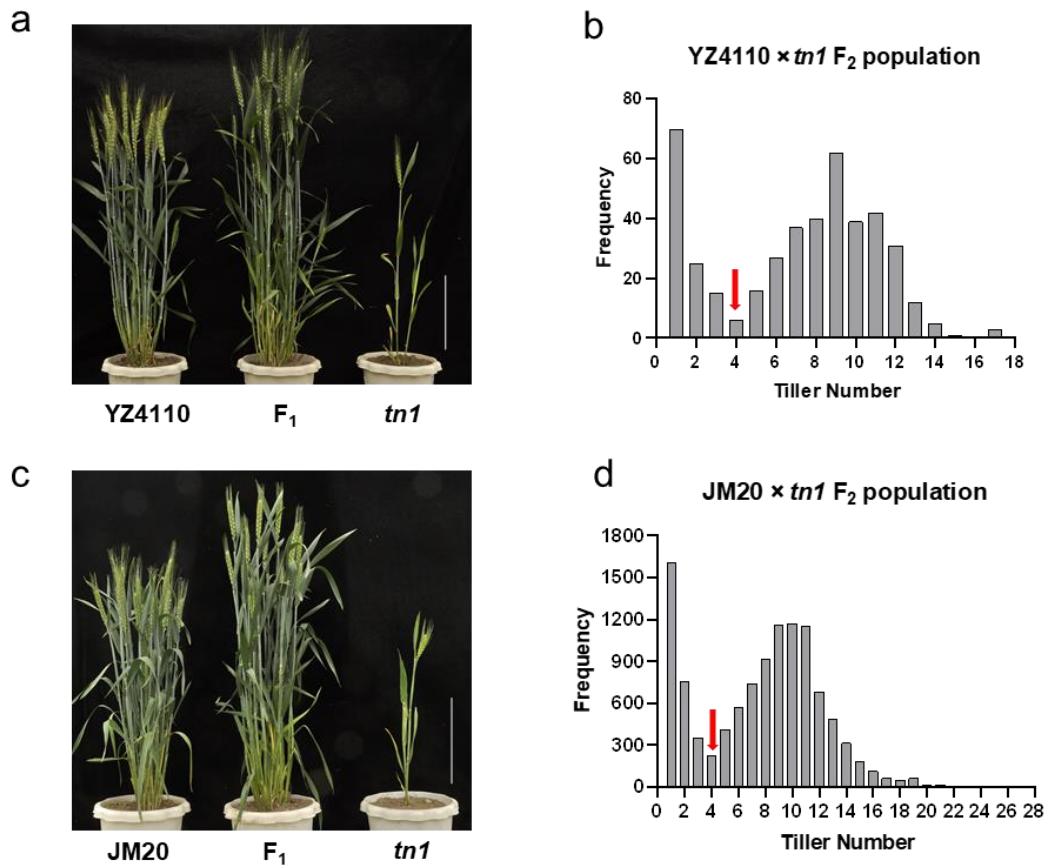

**Supplementary Fig. 2. Genetic analysis of the *tn1* mutant.**

**a**, Morphology of YZ4110, *tn1*, and the resulting F<sub>1</sub> plants. **b**, Frequency distribution of tiller number in the F<sub>2</sub> population derived from the cross between YZ4110 and the *tn1* mutant. **c**, Morphology of JM20, *tn1*, and the resulting F<sub>1</sub> plants. **d**, Frequency distribution of tiller number in the F<sub>2</sub> population derived from the cross between JM20 and the *tn1* mutant. Scale bars, 20 cm in **(a)** and **(c)**. The red arrows in **(b)** and **(d)** indicate the trait value boundary. Source data are provided as a Source Data file.

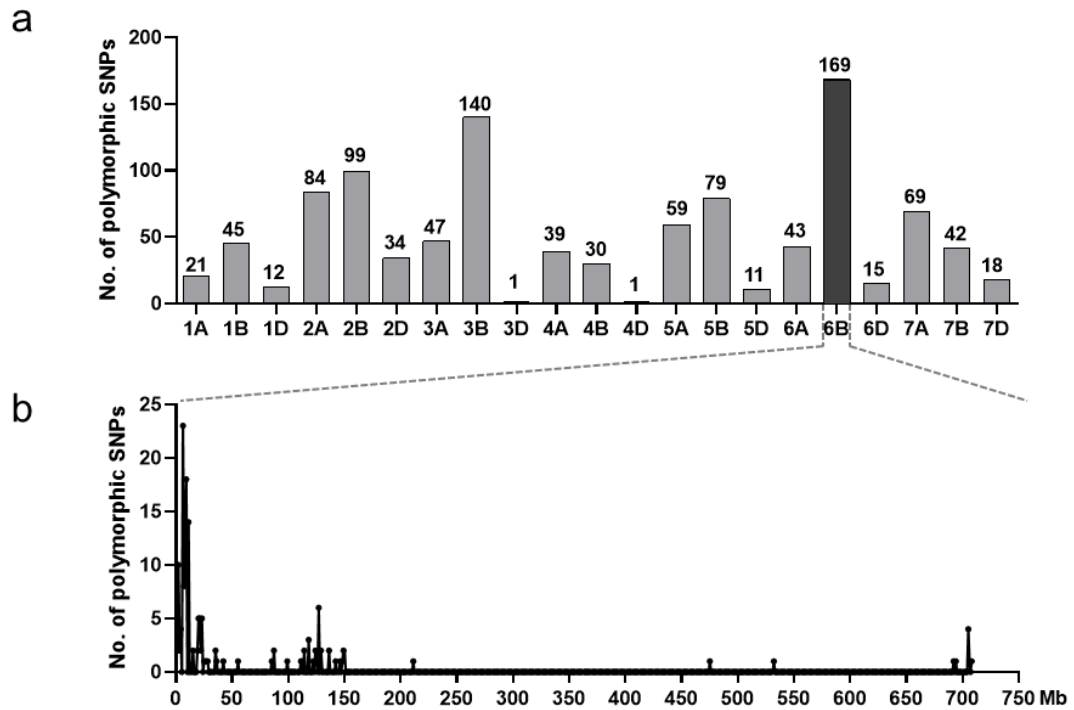

**Supplementary Fig. 3. Distribution of single-nucleotide polymorphisms (SNPs) with biased frequency between pools based on wheat 660K SNP arrays.**

**a**, Number of SNPs with biased frequency on each of the 21 wheat chromosomes based on the wheat 660K SNP array. **b**, Distribution of the SNPs on chromosome 6B. Source data are provided as a Source Data file.

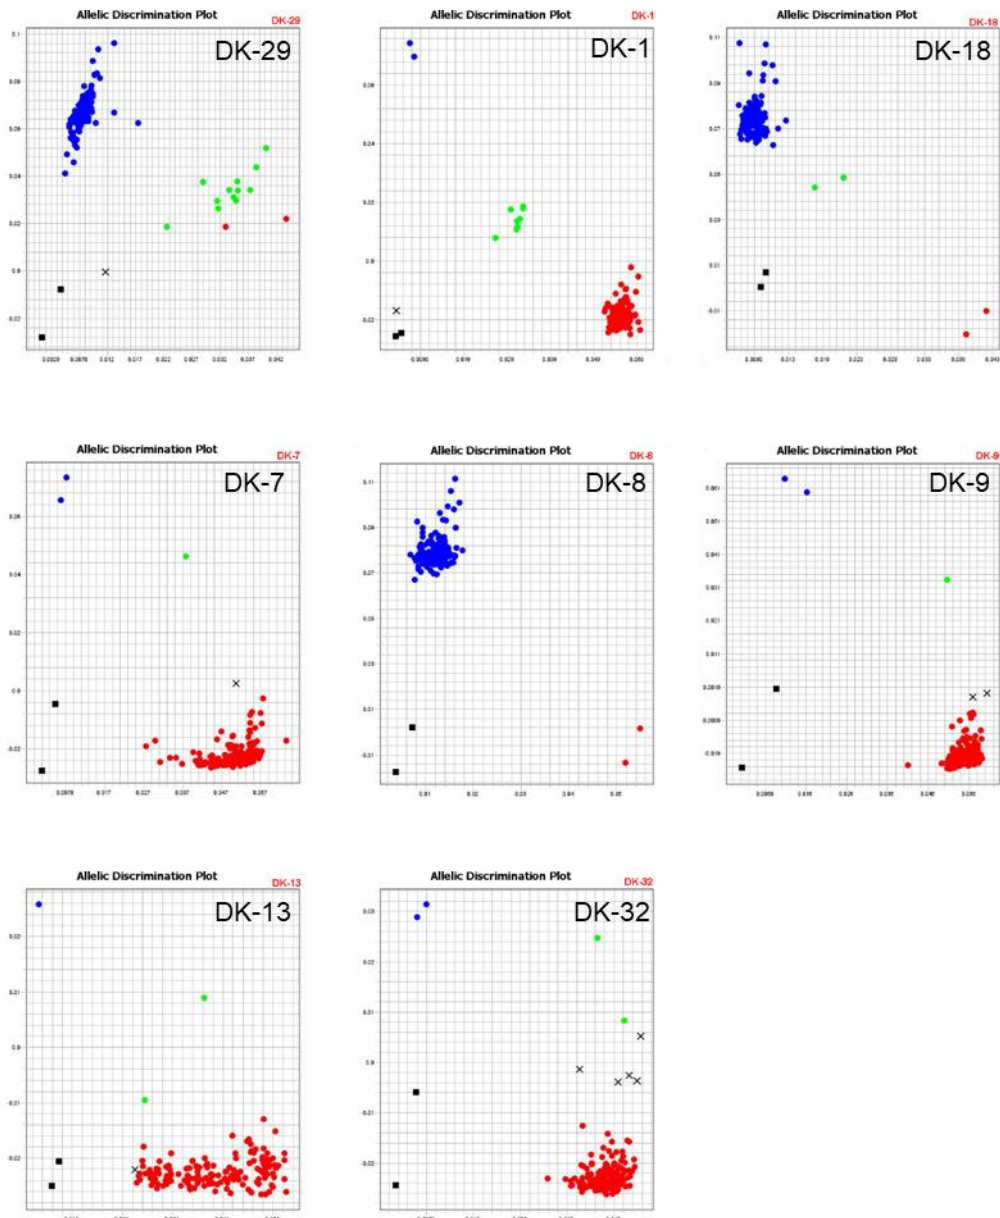

**Supplementary Fig. 4. Allelic discrimination plot of kompetitive allele-specific PCR markers in primary mapping of *TN1*.**

Genotyping analysis of the 186 recessive  $F_2$  individuals, JM20, and *tn1* mutants in primary mapping of *TN1*. Each dot represents one sample; the black squares and green dots represent the non-template control and heterozygous alleles, respectively. The different homozygous alleles are represented by blue and red dots. The black crosses indicate the samples with undetermined genotype.

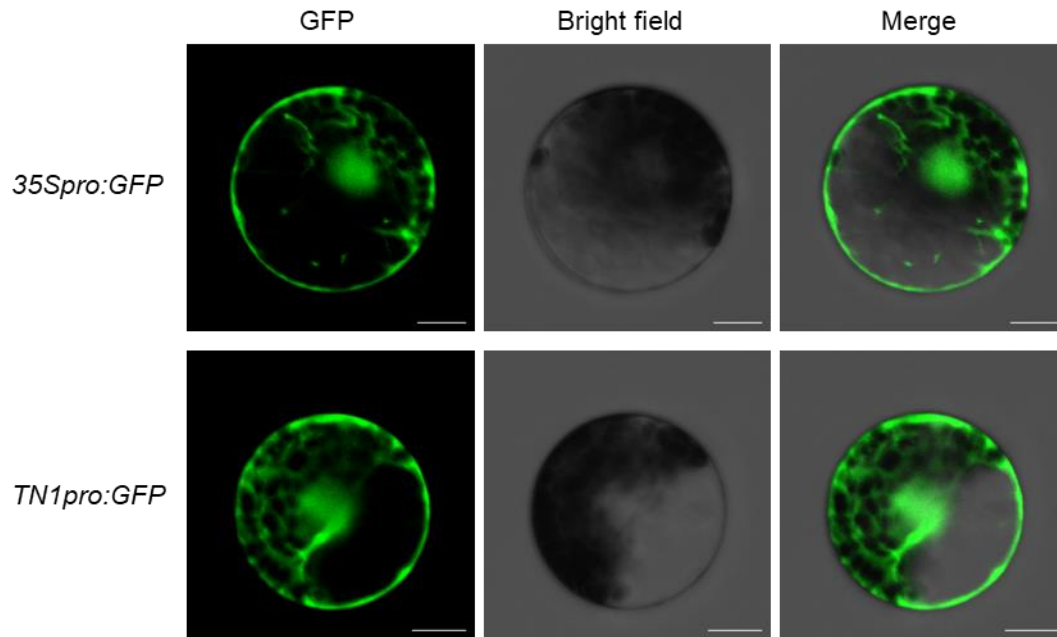

**Supplementary Fig. 5. Activity test of the *TN1* promoter.**

The *TN1pro:GFP* construct, containing a 3,251-bp putative promoter of the *TN1* gene, was transfected into wheat leaf mesophyll protoplasts by the PEG-mediated method. Scale bars, 10  $\mu$ m. Images are representative of three independent experiments.

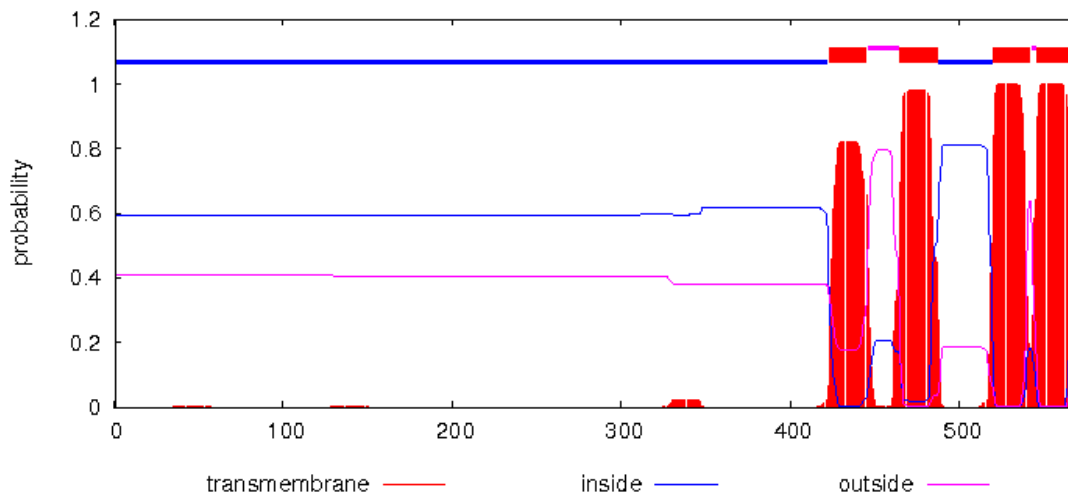

**Supplementary Fig. 6. Topology prediction of the TN1 protein.**

Topology prediction for TN1 using a transmembrane domain hidden Markov model (TMHMM version 2.0).

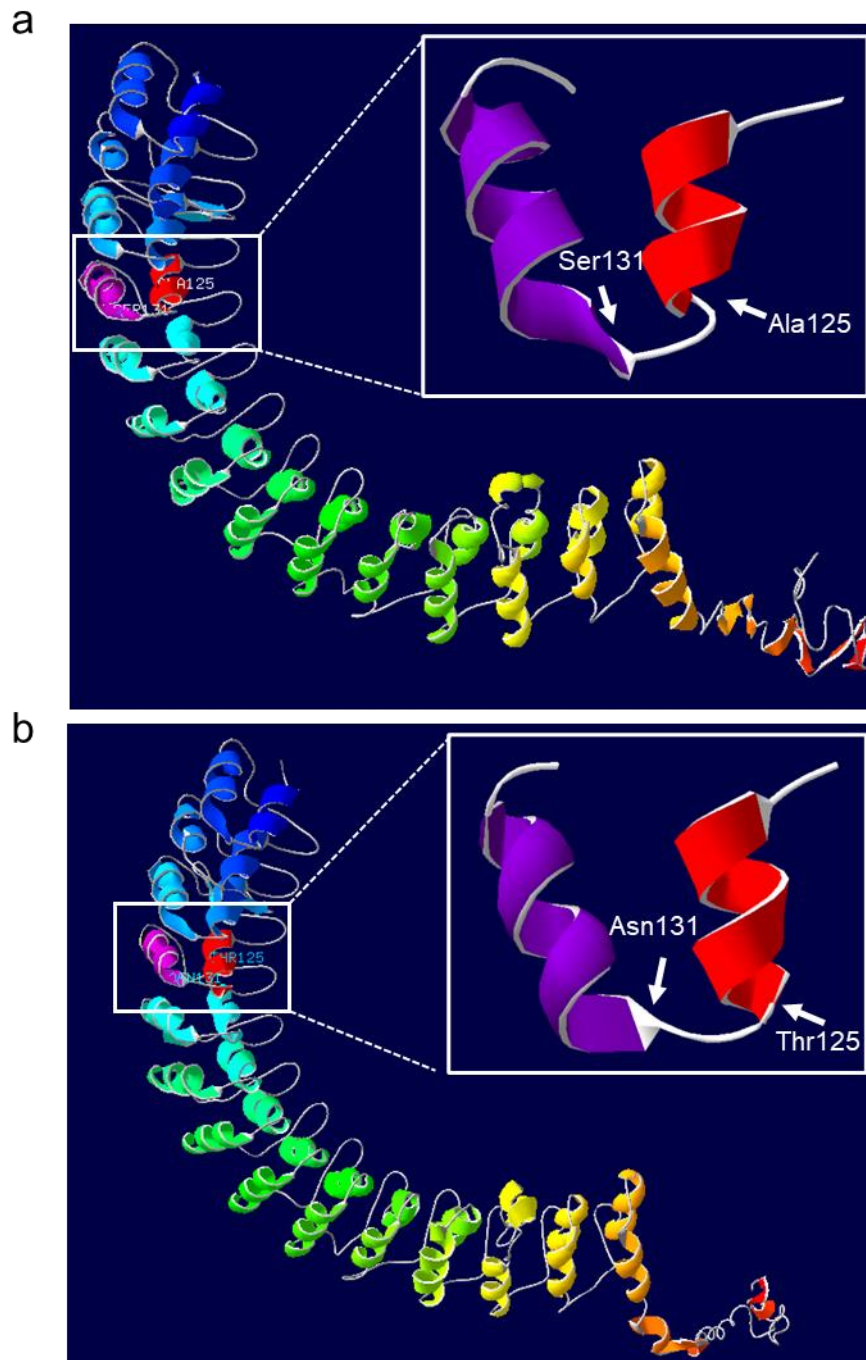

**Supplementary Fig. 7. Predicted three-dimensional structures of the TN1 and tn1 proteins.**

**a–b,** Structures of TN1 (a) and tn1 protein (b) as predicted by I-TASSER (<https://zhanglab.ccmb.med.umich.edu/I-TASSER/>). The differences around the mutation sites are indicated by the white arrows.



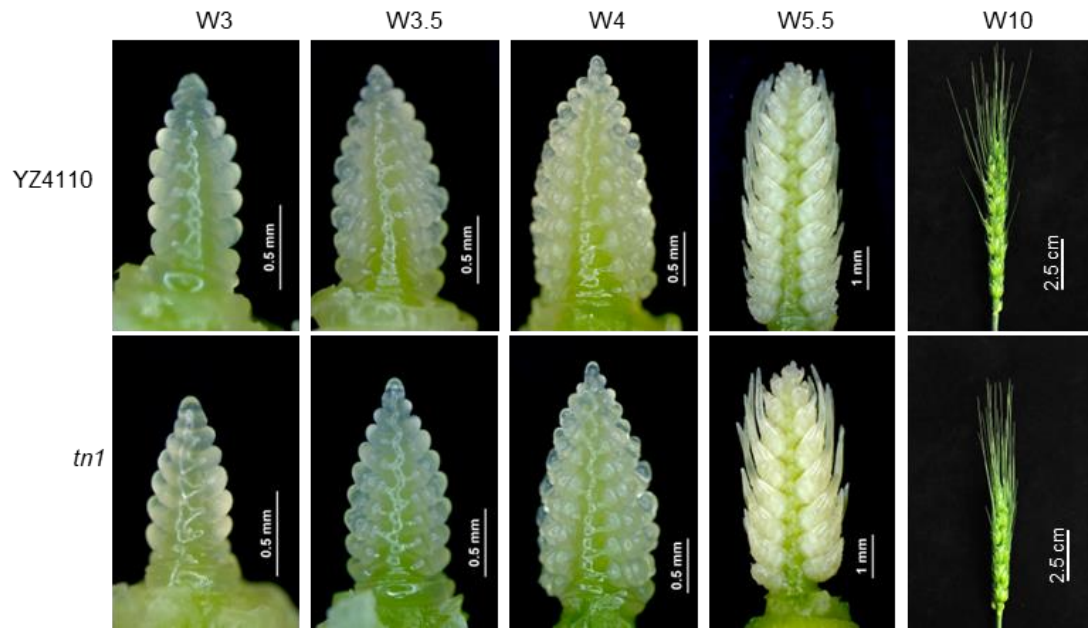

**Supplementary Fig. 8. Inflorescence morphologies of YZ4110 and the *tn1* mutant.**

Inflorescence morphologies of YZ4110 and the *tn1* mutant at different stages. W3, Glume primordium present; W3.5, Floret primordium present; W4, Stamen primordium present; W5.5, Styler canal closing, ovarian cavity enclosed on all sides but still open above; W10, Styles curved outwards and stigmatic branches spread wide, pollen grains on well-developed stigmatic hairs. The inflorescence developmental stages are based on the Waddington scale <sup>1</sup>. Source data are provided as a Source Data file.

TN1-like-6BS 001 ATGGACCCAGCGTTGCAT AAGGCGGCGGTGCA AGGTAGCGT GCAAGCCTGAGG AGCTGGTGGCCGAGCGT CCCGGCAT  
TN1-like-6DS 001 -----ATGTTGCACCAAGGCGGCGGTGCA GGGCGGTGGCAAGCCTGAGGA GCTGGTGGCCGAGCGCCCCGGCAT  
TN1 001 ATGGACCCAGCGTTGCAT AAGGCGGCGGTGCA GGGAGCGTGGCAAGCCTGAGGAAGCTGGTGGCCGAGCG CCCGGCAT  
TN1-like-6BL 001 ATGGATCCAGAGTTGCAC AAGGCGGCGGTGCA GGGGACGCTGCA AAGCCTGAGGAAGCTGGTGGCCGAGCGCCCCGGCAT

TN1-like-6BS 081 CCTTGGTTCC---AAGACGCCCATGGGAACACCGCGTGCACATCGCCGCGAGCTCGGCCATGCGCGTTTTCGCGAGG  
TN1-like-6DS 073 CCTTGGTTCC---AAGACGCCCATGGGAACACCGCGTGCACATCGCCGCGAGCTCGGCCATGCGCGTTTTCGCGAGG  
TN1 081 CCTTGGTTCC---AAGACGCCCATGGGAACACCGCGTGCACATCGCCGCGAGCTCGGCCATGCGCGTTTTCGCGAGG  
TN1-like-6BL 081 CCTTGGTTCC---AAGACGCCCATGGGAACACCGCGTGCACATCGCCGCGAGCTCGGCCATGCGCGTTTTCGCGAGG

TN1-like-6BS 158 AGGCCCTGGGTGGAGCA CAAGCTGCTCGT CAGCAGGAACGCCGACGGCGACAC CGGCTGCAGTGGCGGCTAGGGTG  
TN1-like-6DS 143 CGGCCCTGGGTGGAGCA CAAGCTGCTCGT CAGCAGGAACCAAGCCTGCGTGCATGGCCTATGAGGCGGCCAGGGCG  
TN1 158 AGGTCTGGGTGGAGCA CAAGCTGCTCGT CAGCAGGAACGCCGATGGCGACACGGCTGCAGCTGGCGGCCAGGGTG  
TN1-like-6BL 158 AGGCCCTGGGTGGAGCA CAAGCTGCTCGT CAGCAGGAACGCCGACGGCGACACGGCTGCAGCTGGCGGCCAGGGTG

TN1-like-6BS 238 GGGAAGGTGGACGTTGTGGACCTGCTCATCTCCGAGCATGGTATGGCATGCGGAGCATCCGCACTACTTCCCCGCCG  
TN1-like-6DS 220 GGGAAGGTGGACGTTGTGGACCTGCTCATCTCCGAGCATGGTATGGCATGCGGAGCATCCGCACTACTTCCCCGCCG  
TN1 238 GGTAAAGGTGGACGTTGTGGACCTGCTCATCTCCGAGCATGGTATGGCATGCGGAGCATCCGCACTACTTCCCCGCCG  
TN1-like-6BL 238 GGGAAGGTGGACGTTGTGGACCTGCTCATCTCCGAGCATGGTATGGCATGCGGAGCATCCGCACTACTTCCCCGCCG

TN1-like-6BS 318 ACAGAATGGACAGACCGGGAAACCTTCCCGAGCCCCCTCCAGCGCGCACGGGCTCTGTTGATGGCCAACAAGGCCG  
TN1-like-6DS 276 -----CGCGCACGGGCTCTGTTGATGGCCAACAAGGCCG  
TN1 303 -----GACTCCCATGGGAGCGAGCAGGGGCGGTGCTCATGGCCAACAAGGCCG  
TN1-like-6BL 297 -----CTCCCTGGGAGCGAGCAGGAGCCTCTGTTGATGGCCAACAAGGCCG

TN1-like-6BS 398 GCGACACCCCGCTCACGAGCGGTGAAGCATCGCAGGACCGCGTCCGGCTCAGGCTGTGGAAACCGAGCCAGCGCG  
TN1-like-6DS 311 GCGACACCCCGCTCACGAGCGGTGAAGCAGGCAGGAGCGCGTCCGGCTCAGGCTGTGGAAACCGAGCCAGCGAGC  
TN1 353 GCGACACCCCGCTCACGAGCGGTGAAGCAGGCAGGAGCGCGTCCGGCTCAGGCTGTGGAAACCGAGCCAGCGCTA  
TN1-like-6BL 344 GCGACACCCCGCTCACGAGCGGTGAAGCAGGCAGGAGCGCGTCCGGCTCAGGCTGTGGAAACCGAGCCAGCGGT

TN1-like-6BS 478 GGCCACGTCGCTCAACGTGAAGCAGCAGACGCGCTCACATCGCCGCGGGGAGGGCCTCTACGACGTCGTGGCCAAGAT  
TN1-like-6DS 391 GGCCACGTCGCTCAACGTGAAGCAGCAGACGCGCTCACATCGCCGCGGGGAGGGCCTCTACGACGTCGTGGCCAAGAT  
TN1 433 GGCCACGTCGCTCAACGTGAAGCAGCAGACGCGCTCACATCGCCGCGGGGAGGGCCTCTACGACGTCGTGGCCAAGAT  
TN1-like-6BL 424 GGCCACGTCGCTCAACGTGAAGCAGCAGACGCGCTCACATCGCCGCGGGGAGGGCCTCTACGACGTCGTGGCCAAGAT

TN1-like-6BS 558 CTTACGACAGCCCTGTGAACACGACAGGTTTTCGCCCTC-----CTCAGCGGCTCCGCGCTGCACCAAGGCGCTCTCT  
TN1-like-6DS 471 CTTACGACAGCCCTGTGGTCCACGAGAGCTTTGTCCCTCTGACTCCGCTCAGCGGCTCCGCGCTGCACCAAGGCGCTCTCT  
TN1 513 CTTACGACAGCCCTGTGGTCCACGAGAGCTTTGTCCCTCTGACTCCGCTCAGCGGCTCCGCGCTGCACCAAGGCGCTCTCT  
TN1-like-6BL 504 CTTACGACAGCCCTGTGGTCCACGAGAGCTTTGTCCCTCTGACTCCGCTCAGCGGCTCCGCGCTGCACCAAGGCGCTCTCT

TN1-like-6BS 632 GCGGCCACGAAACGCTGGTGGAGATCTTGCTGACGCTGACGCGCGGGATCAGATCGGGCTGACGGACTCGAGCGGAGAA  
TN1-like-6DS 551 GCGGCCACGAAACGCTGGTGGAGATCTTGCTGACGCTGACGCGCGGGATCAGATCGGGCTGACGGACTCGAGCGGAGAA  
TN1 593 GCGGCCACGAAACGCTGGTGGAGATCTTGCTGACGCTGACGCGCGGGATCAGATCGGGCTGACGGACTCGAGCGGAGAA  
TN1-like-6BL 584 GCGGCCACGAAACGCTGGTGGAGATCTTGCTGACGCTGACGCGCGGGATCAGATCGGGCTGACGGACTCGAGCGGAGAA

TN1-like-6BS 712 AACCGCTGCACTACGCGCGCAGAAGAACAACGCCCGCTGGTGAAGCTGCTGCTAACCGGAAGGTGGACTGGCCTA  
TN1-like-6DS 631 AACCGCTGCACTACGCGCGCAGAAGAACAACGCCCGCTGGTGAAGCTGCTGCTAACCGGAAGGTGGACTGGCCTA  
TN1 673 AACCGCTGCACTACGCGCGCAGAAGAACAACGCCCGCTGGTGAAGCTGCTGCTAACCGGAAGGTGGACTGGCCTA  
TN1-like-6BL 664 AACCGCTGCACTACGCGCGCTCAAGAACAACGCCCGCTGGTGAAGCTGCTGCTAACCGGAAGGTGGACTGGCCTA

TN1-like-6BS 792 CAAGCGCAACCGTGACCTGCAGTCCGCGCTGCACCTGGCCGCTACTACGGCTCGACCAAGGCCATGGCGGAGCTGCTGC  
TN1-like-6DS 711 CAAGCGCAACCGTGACCTGCAGTCCGCGCTGCACCTGGCCGCTACTACGGCTCGACCAAGGCCATGGCGGAGCTGCTGC  
TN1 753 CAAGCGCAACCGTGACCTGCAGTCCGCGCTGCACCTGGCCGCTACTACGGCTCGACCAAGGCCATGGCGGAGCTGCTGC  
TN1-like-6BL 744 CAAGCGCAACCGTGACCTGCAGTCCGCGCTGCACCTGGCCGCTACTACGGCTCGACCAAGGCCATGGCGGAGCTGCTGC

TN1-like-6BS 872 TGCAGTGCCTGATCGGGCGGAGATGGTGGACCCACCGCAGGAACCGGTTGCATGTCGCCATCACCATCGGCAAGGTG  
TN1-like-6DS 791 AGCAGTGCCTGACCTGGCGGAGATGGTGGACAGCAACCGCAGGAACCGGTTGCATGTCGCCATCACCATCGGCAAGGTG  
TN1 833 AGCAGTGCCTGACCTGGCGGAGATGGTGGACAGCAACCGCAGGAACCGGTTGCATGTCGCCATCACCATCGGCAAGGTG  
TN1-like-6BL 824 GGCATGTCCTGACCTGGCGGAGACGCTGGACAGCAACCGCAGGAACCGGTTGCATGTCGCCATCACCATCGGCAAGGTG

TN1-like-6BS 952 GACGTGCTCCCTGCTCTCAAGCTGGTGGCCCCGAGGACACTTCAACCATGTCCAGCCGACGCAACACGCGCT  
TN1-like-6DS 871 GACGTGCTCCCTGCTCTCAAGCACGTGGCCCCGAGAGATTTCAACCATGGTTGACACAGATGGCAACACGCGCT  
TN1 913 GACGCCCTCAAGTGGCTGCTCAAGCAAGTGGCCCCGAGGAGATCTCAATCTGTCGACCAAGGCAACACGCGCT  
TN1-like-6BL 904 GACGCCCTCAAGTGGCTGCTCAAGCACGTGGCCCCGAGGAGATCTCAATCATGTCCAGCACCGGCAACACGCGCT

TN1-like-6BS 1032 TCATCTGGCGCCAGTTTAATCGACACCGCTTGGCTGTGCTGCTCAAGGACCGCGGGTGAACCCATGCGTCTCTCA  
TN1-like-6DS 0951 TCATCTGGCGCCAGTTTAATCGACACCGCTTGGCTGTGCTGCTCAAGGACCGCGGGTGAACCCATGCGTCTCTCTCA  
TN1 0993 GCACCTGGCGCTCCCTGTCCGCTTCAAGTCCGCTGCTCTGCTCAAGGACCGCGGGTGAACCCATGCGTCTCTCTCA  
TN1-like-6BL 0984 GCACCTGGCGCTCCCTGTCCGCTTCAAGTCCGCTGCTCTGCTCAAGGACCGCGGGTGAACCCATGCGTCTCTCTCA

TN1-like-6BS 1112 ACCGCAACGGCCACCGCTCGGAGCTTTATCGAGACACAACACCAAGTGATACTCAGGTAATTTATGCTACTT  
TN1-like-6DS 1031 ACCGCAACGGCCACCGCTCGGAGCATTCAGAGAGCAACACCTGTCGATAGCTTCAGGTTATTCAGGTTACTT  
TN1 1073 ACCGGGACGGCCAGTCCGCGCGAGTCTCATCGAGAAGCCACCACTGAGGAGTTGGACACTA-CGAGATGTACTT  
TN1-like-6BL 1064 ACCGGGACGGCCAGTCCGCGCGAGTCTCATGAGAAGCCACCACTGAGGAGATGGACGCTA-CGAGATGTACTT

## Supplementary Fig.9 Continued

```

TN1-like-6BS 1191 CTGGAGGAGCTAAAGAAGCAAGATCCATCAATGCAAGCGCAACAGCTGCCCCCTGAAACAACGGCTGATTGGTTG-
TN1-like-6DS 1110 CTGGAGGAGCTAAAGAAGCAAGATCCATCAATGCAAGCGCAACAGCTGCCCCCTGAAACAACGGCTGATTGGTTG-
TN1 1152 GTGGAGGAGCTAAAGAAGTCCGAGGGTTCCAGGTGCAAGACGTCGGCTGCCCCCTCCTCCCGCTCTACCGGTCC
TN1-like-6BL 1143 GTGGAGGAGCTAAAGAGTCCGAGGCCCTCAGGTGCAAGACGA---GCTGCTGCCTCCGGTCACGCTGACCAATGGG

TN1-like-6BS 1270 -----CAGGACCT--CAACCAAGT-ACGTGCAGCAPAGGTGGGACCTACACTCTCGTGGCAACTCTCATCGCAACG
TN1-like-6DS 1258 -----CAGGACCT--CAACCAAGT-ACGTGCAGCAPAGGTGGGACCTACACTCTCGTGGCAACTCTCATCGCCACG
TN1 1232 GCGTAGTCAGGACCAAGGCGGCTGGCCAGCAGAGTTCAACCTCCAT-----GCTGGTGGCCACACTGATCGCCACT
TN1-like-6BL 1220 TGCCCAGACCGAG-----GGCTGGCAACGAGGAGTTCAACCTCGGGACCTACAGGCTGGTGGCCAGGCTGATCGCCACT

TN1-like-6BS 1339 GTCACCTTCCTTCAACCTTCACCATGCCGGGGGTACAGCCAGGATGGCACGGCCATCCCTGGCCACCAGCCAGG
TN1-like-6DS 1258 GTGCAATTCCTTCAACCTTCACCATGCCGGGGGTACAGCCAGGATGGCACGGCCATCCCTGGCCACCAGGTGGC
TN1 1306 GTCAGCTTTCCTCCGACCTTCACCATGCCGGGGGTACAGCCAGGATGGCACGGCCATCCAGGCCACAGGGCGG
TN1-like-6BL 1294 GTCAGCTTTCCTCCGACCTTCACCATGCCGGGGGTACAGCCAGGATGGCACGGCCATCCAGGCCACAGGGCGG

TN1-like-6BS 1419 ATTCAAATCTCTTCTCCTTCGCGAATACCTTGGCAATGCTAACGTCATATCGTCGTTGTCTTCGGCTT---CATCTGGGCAA
TN1-like-6DS 1338 ATTCAAATCTCTTCTCCTTCGCGAATACCTTGGCAATGCTAACGTCATATCGTCGTTGTCTTGGCTT---CATCTGGGCAA
TN1 1386 ATTCAAATCTTCTGTCCTCCACACAGTGTGGCCTGTGTGCACTCCATCGTCGTTGTCTTCTGTCACACCATGTGGGCAT
TN1-like-6BL 1374 GTTCAAATCTTCTCCTCCTCCTCCACACAGTGTGGCCTGTGTGCACTCCATCGTCGTTGTCTTCTGTCACACCATGTGGGCAT

TN1-like-6BS 1496 GAGGGAGCAGC-----TCGATTTTAGACCGGCAAGGTCAT-----AGCT----TGGAGC
TN1-like-6DS 1415 GAGGGAGCAGC-----TCGATTTCAGGACCGCAAGGTCAT-----AGCT----TGGAGC
TN1 1466 GGCAGAGCGGGAGTGGGAGCGGAGCCCACTGAGCACAAGTCTTCCGGTCAAGCTGGAGCCGCAAGCTCATGTGGAGC
TN1-like-6BL 1454 GGCAGGACCCG-----TCGAG-----GTGAGCTCAAGCTCAATCGGTCATGTGGAGCCGCAAGCTCATGTGGAGC

TN1-like-6BS 1543 CATTGGCTCAGCTCATCGCCTGCCCTCCATGCTCGGCTCCCTGACCCCTCTGTCTACCTCACCGTCTGGCAGAGGC
TN1-like-6DS 1462 CATTGGCTCAGCTCATCGCCTGCCCTCCATGCTCGGCTCCCTGACCCCTCTGTCTACCTCACCGTCTGGCAGAGGC
TN1 1546 CCGAGGCTCACAATATCGCCTTCCCTCGCCATGCTCGCTCCCTTCCATGAGGCGCTCTACATCACCGTTCGCGCCACCGC
TN1-like-6BL 1522 CCGAGGCTCACAATATCGCCTTCCCTCGCCATGCTCGCTCCCTTCCATGAGGCGCTCTACATCACCGTTCAGCCACCACT

TN1-like-6BS 1623 ACCGTGGCTCGCGTATATACTCATTTGATGGTTGCAGCACTCCCTTCGTTGTTGTTCTGATGTTGGCAAAGACTTGT
TN1-like-6DS 1542 ACCGTGGCTCGCGTATATACTCATTTGATGGTTGCAGCACTCCCTTCGTTGTTGTTCTGATGTTGGCAAAGACTTGT
TN1 1626 GAGGTGGCTCGCGTACCTTGTGATCCCATCTAGCCAGTACTCCCTTGTGTTGTTCTCACCTTTGGTAAGAGATGT
TN1-like-6BL 1602 GAGGTGGCTCGCGTACCTTGTGATCCCATCTAGCCAGCACTCCCGCGTCTGTTCTCACCTTGGTAAGAGACT

TN1-like-6BS 1703 TCGCCACACGAGTGTAG
TN1-like-6DS 1622 TCGCCACACGAGTGTAG
TN1 1706 AG-----
TN1-like-6BL 1682 TCTACTCCCACTATA

```

**Supplementary Fig. 9. Alignment of the coding sequences of *TN1*, *TN1-like-6BS*, *TN1-like-6BL*, and *TN1-like-6DS*.**

The mutation sites in *TN1* are highlighted in red. White, gray, and black backgrounds represent the extent of sequence identity. *TN1*, *TraesCS6B02G013100*; *TN1-like-6BL*, *TraesCS6B02G437600*; *TN1-like-6BS*, *TraesCS6B02G013000*; *TN1-like-6DS*, *TraesCS6D02G011400*.

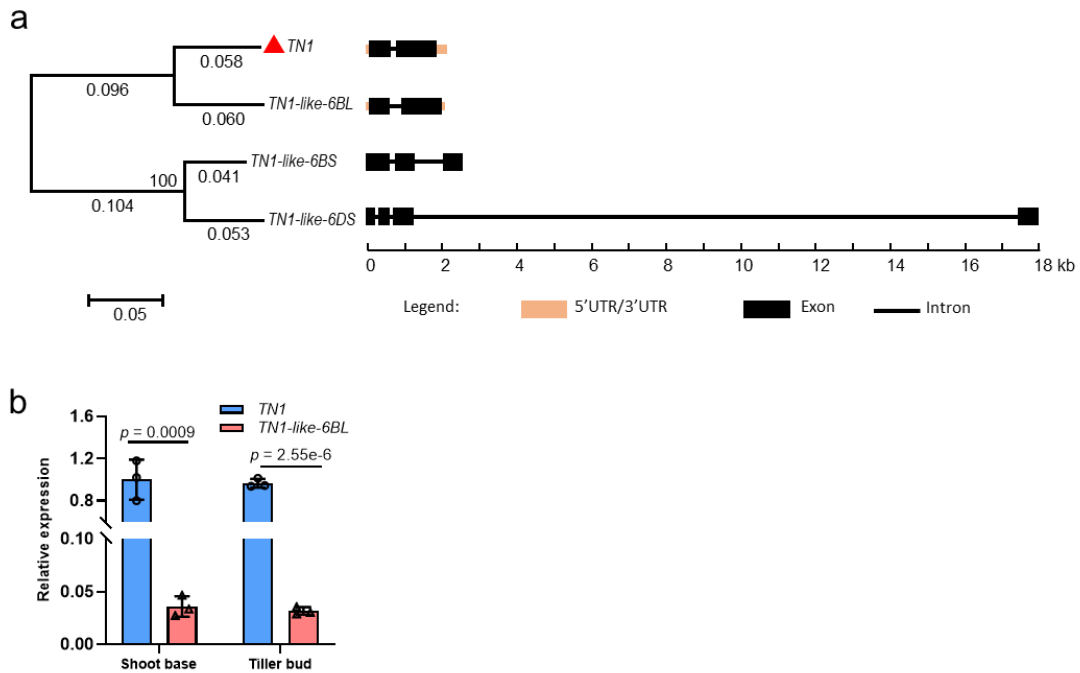

**Supplementary Fig. 10. Phylogenetic tree, gene structures, and expression pattern of *TN1* homologs in hexaploid wheat.**

**a**, Three *TN1* homologs were identified by performing a BLAST search using the complete coding sequence of *TN1* as a query. The phylogenetic tree was constructed using MEGA 7.0 and the neighbor-joining method. Bootstrap values calculated from 1,000 replicates are marked on the branch nodes; branch length represents substitutions per site and is marked above the branches. The *TN1* gene is indicated by the red triangle.

**b**, Relative expression levels of *TN1* homologs at the shoot base and in tiller buds. The relative expression levels were normalized to *TaGAPDH*. Data are means  $\pm$  SD of three biological replicates, and  $p$  values are indicated by two-tailed unpaired  $t$ -test. Source data underlying Supplementary Fig. 10b are provided as a Source Data file.

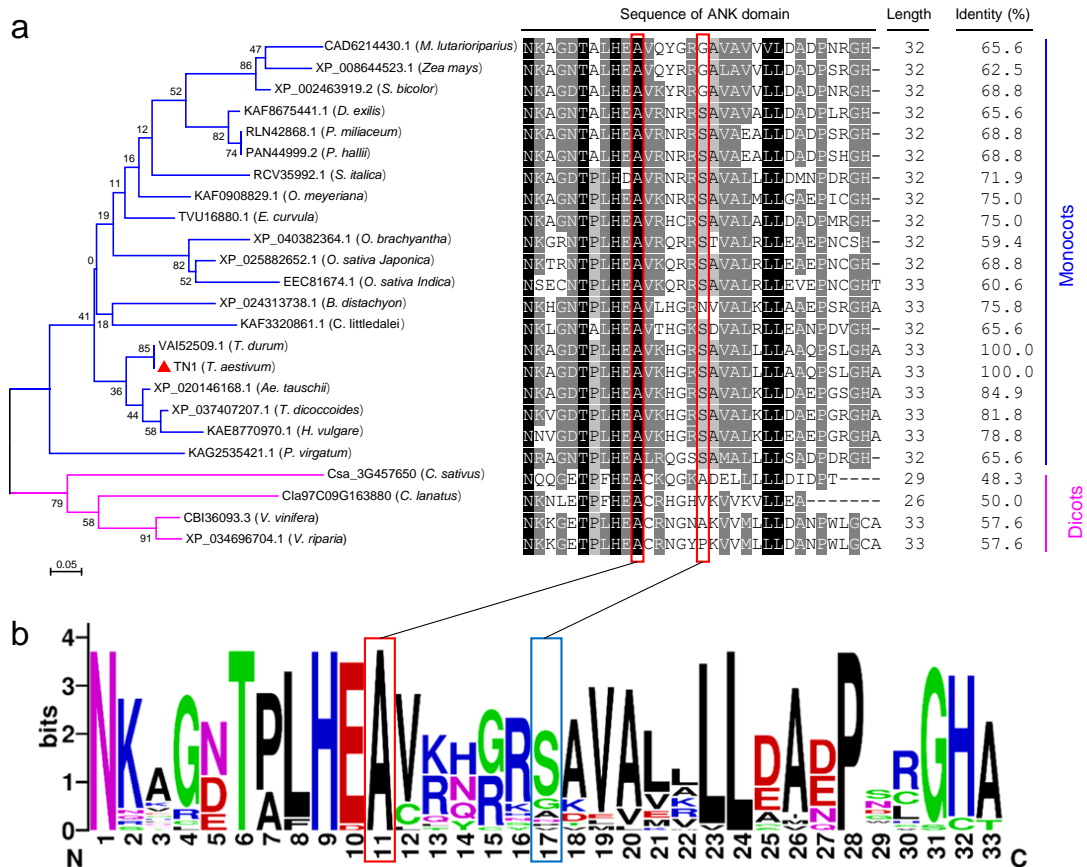

**Supplementary Fig. 11. Phylogenetic analysis for the third ANK (ANK<sup>3rd</sup>) domain of TN1.**

**a**, Phylogenetic tree of the ANK<sup>3rd</sup> domain in TN1 and its homologs from monocots and dicots. The phylogenetic tree was constructed using MEGA 7.0 and the neighbor-joining method, and bootstrap values calculated from 1,000 replicates are marked on the branch nodes. Branch length represents substitutions per site. The sequences of the ANK domain used for phylogenetic tree construction are listed on the right panel. The mutation sites in the tn1 protein are indicated with red boxes. **b**, Conservation analysis of the ANK<sup>3rd</sup> domain in TN1. The red/blue-boxed regions represent the positions of the mutation sites.

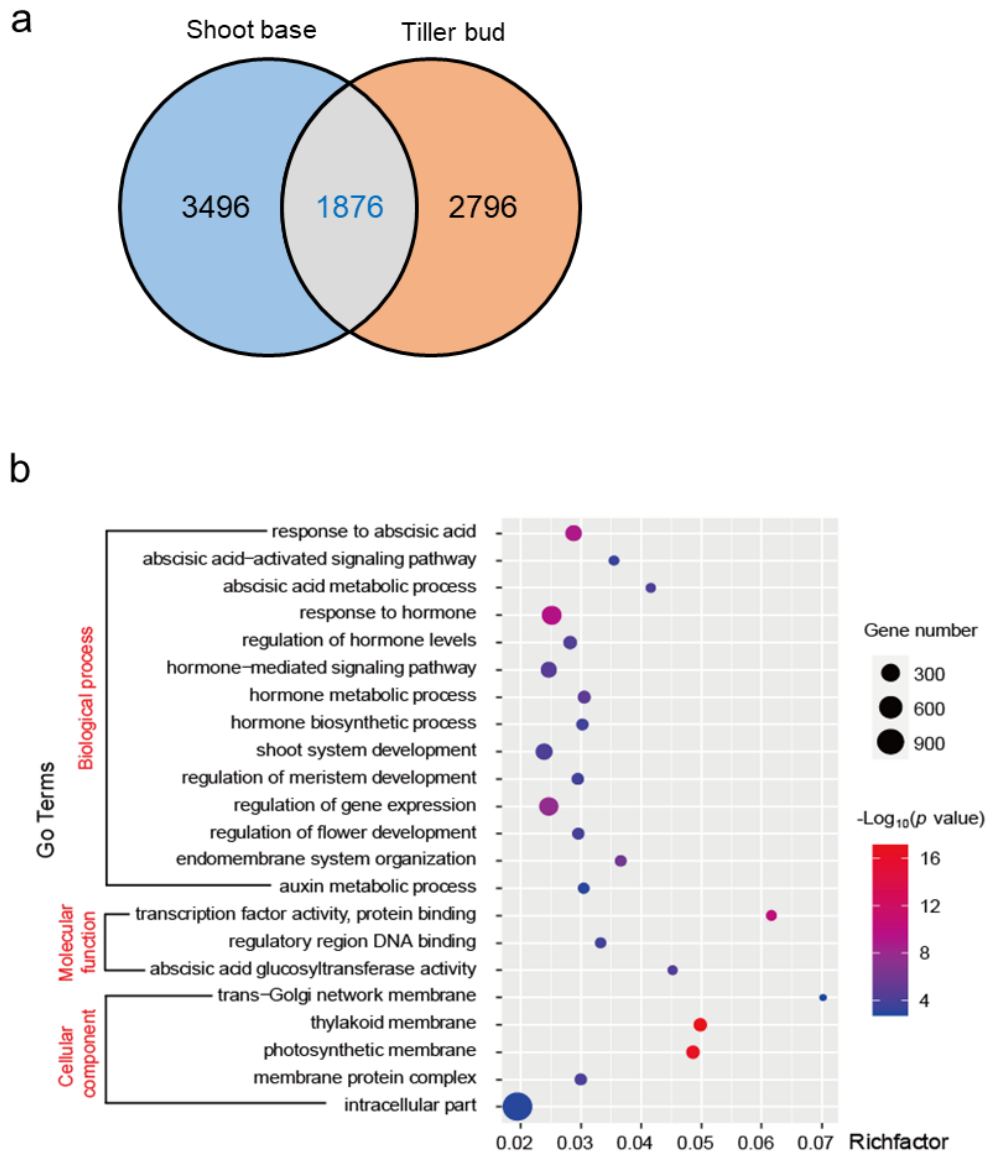

**Supplementary Fig. 12. RNA-seq analysis between YZ4110 and the *tn1* mutant.**

**a**, Venn diagram of differentially expressed genes (DEGs) between YZ4110 and the *tn1* mutant at the shoot base and in tiller buds. Genes with  $\log_2(\text{fold-change}) \geq 1$ ,  $p$  value  $< 0.05$  were considered as DEGs. **b**, Major pathways of DEGs in Gene Ontology (GO) analysis. The unadjusted  $p$  values in **(a)** and **(b)** were determined by two-sided Fisher's exact test, no adjustment made for multiple comparisons.

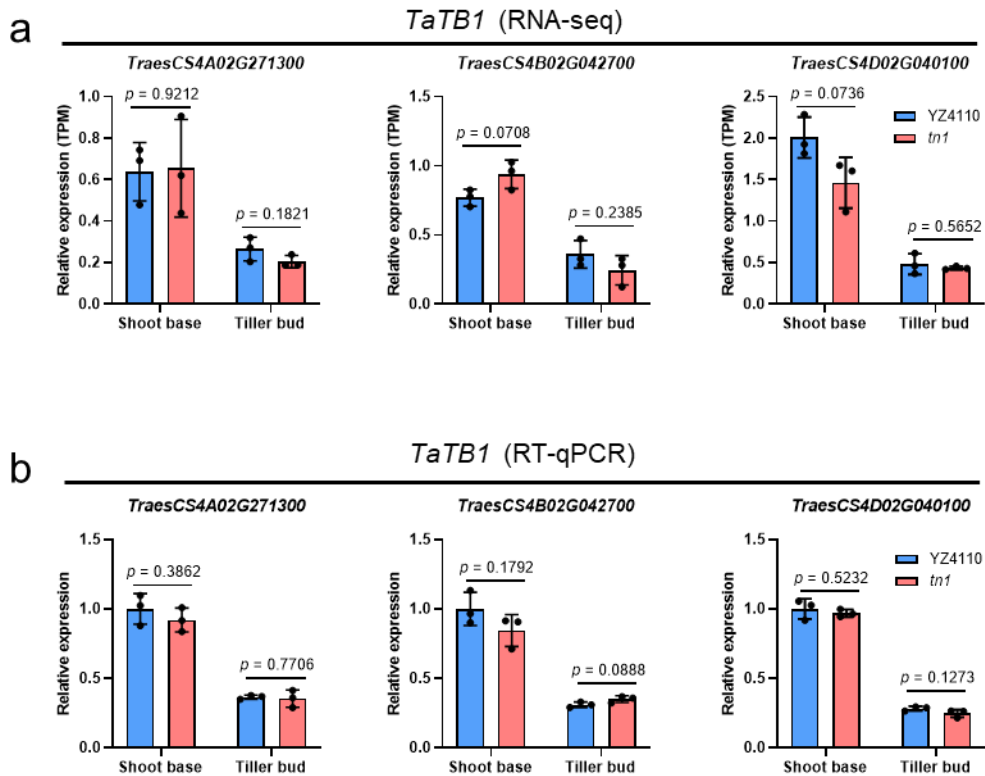

**Supplementary Fig. 13. Expression patterns of *TaTB1* genes in the *tn1* mutant.**

**a–b**, Expression analysis of *TaTB1* genes based on RNA-seq data (**a**) and RT-qPCR (**b**). The expression levels in RNA-seq are represented as transcripts per million (TPM). The relative expression levels were normalized to *TaGAPDH*. Data are means  $\pm$  SD of three biological replicates, and  $p$  values are indicated by two-tailed unpaired  $t$ -test. Source data are provided as a Source Data file.

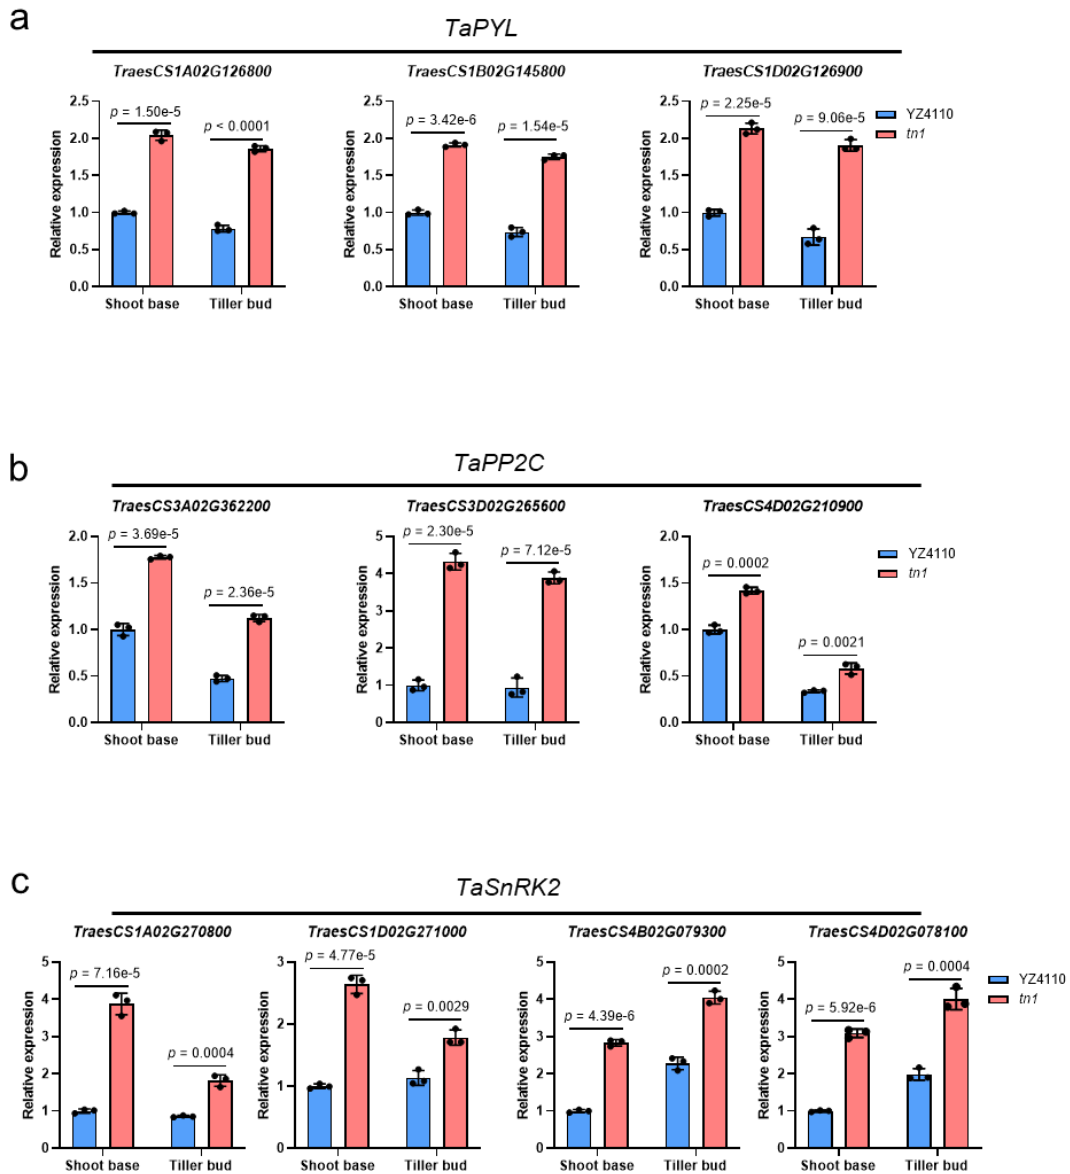

**Supplementary Fig. 14. Expression patterns of abscisic acid (ABA)–related genes in the *tn1* mutant.**

**a–c**, Expression patterns of the ABA signaling genes *TaPYL* (**a**), *TaPP2C* (**b**), and *TaSnRK2* genes (**c**) in YZ4110 and the *tn1* mutant. The relative expression levels were normalized to *TaGAPDH*. Data are means  $\pm$  SD of three biological replicates, and *p* values are indicated by two-tailed unpaired *t*-test. Source data are provided as a Source Data file.



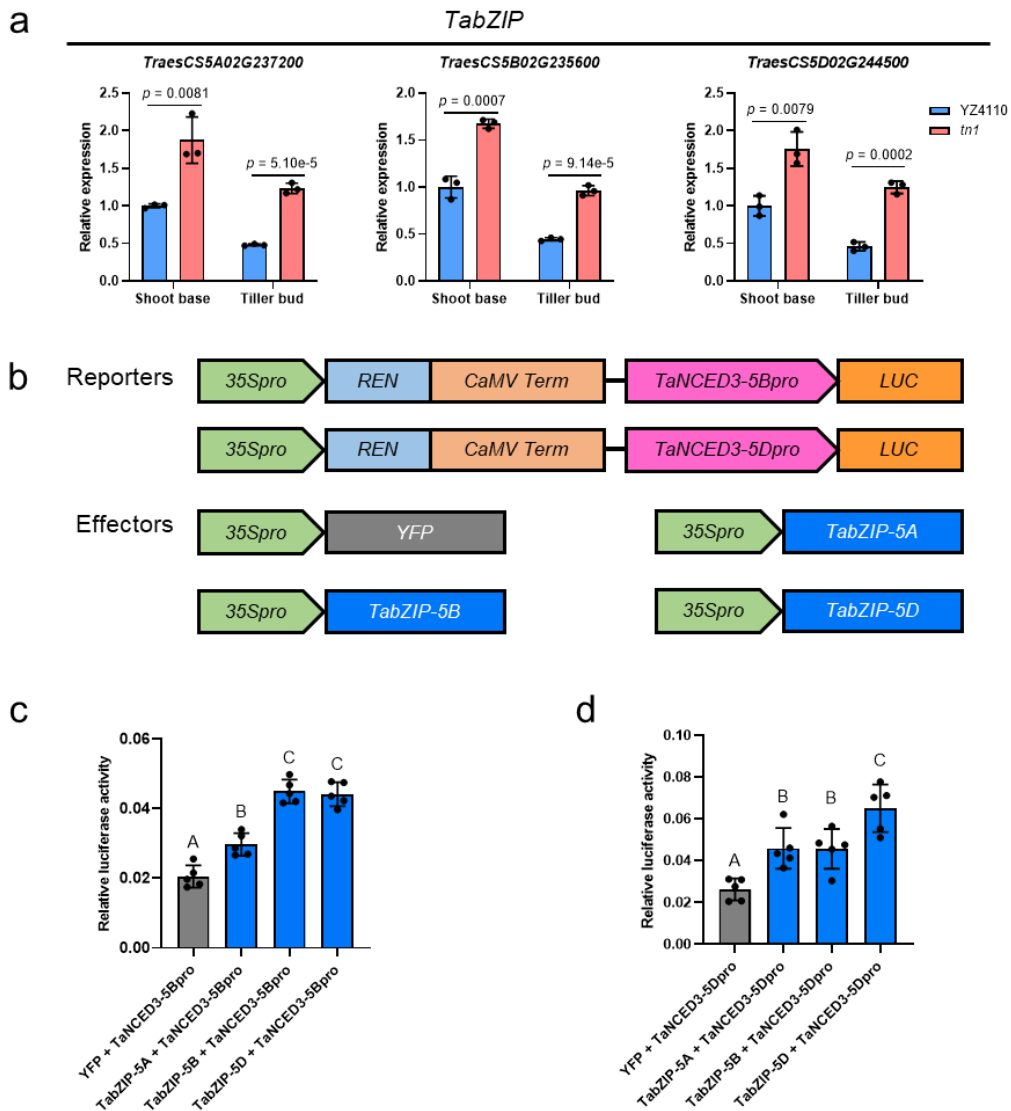

**Supplementary Fig. 15. TabZIP proteins can activate transcription from the *TaNCED3* promoters in a transient transactivation assay.**

**a**, RT-qPCR analyses showing the expression patterns of *TabZIP-5A/5B/5D* genes in the *tn1* mutant. The relative expression levels were normalized to *TaGAPDH*. Data are means  $\pm$  SD of three biological replicates, and *p* values are indicated by two-tailed unpaired *t*-test. **b**, Schematic diagrams of the effector and reporter constructs used in the dual-luciferase reporter assays. *35Spro*, cauliflower mosaic virus (CaMV) 35S promoter; *CaMV term*, CaMV terminator; *REN*, *Renilla* luciferase gene; *LUC*, firefly luciferase gene. **c–d**, Transactivation of *TaNCED3-5B/5D* genes by TabZIP proteins. The relative luciferase activity is expressed as the LUC/REN activity ratio. Data in (c) and (d) are shown as means  $\pm$  SD (*n* = 5 biologically replicates). Different letters indicate significant differences between groups, as determined by one way ANOVA with Duncan's multiple range tests (*p* < 0.01). Source data are provided as a Source Data file.

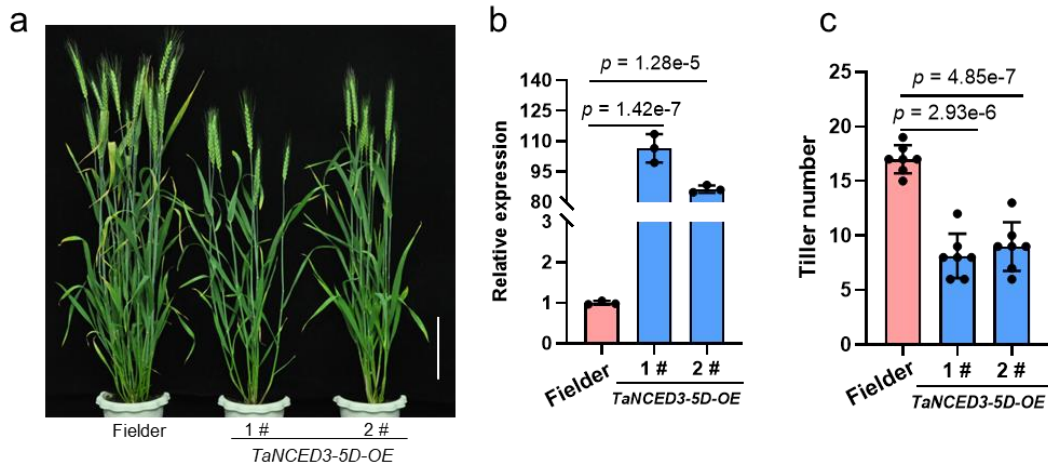

**Supplementary Fig. 16. Morphological characteristics of *TaNCED3-5D* overexpression wheat plants.**

**a**, Morphology of T<sub>1</sub> generation *TaNCED3-5D* overexpression wheat plants. Scale bar, 15 cm. **b**, Relative expression levels of *TaNCED3-5D* in the leaf of transgenic lines. The relative expression levels were normalized to *TaGAPDH*. Data are means  $\pm$  SD of three biological replicates. **c**, Tiller number for Fielder, and positive transgenic lines. Data are means  $\pm$  SD ( $n = 7$  independent transgenic plants). The  $p$  values in (b) and (c) are indicated by two-tailed unpaired  $t$ -test. Source data are provided as a Source Data file.

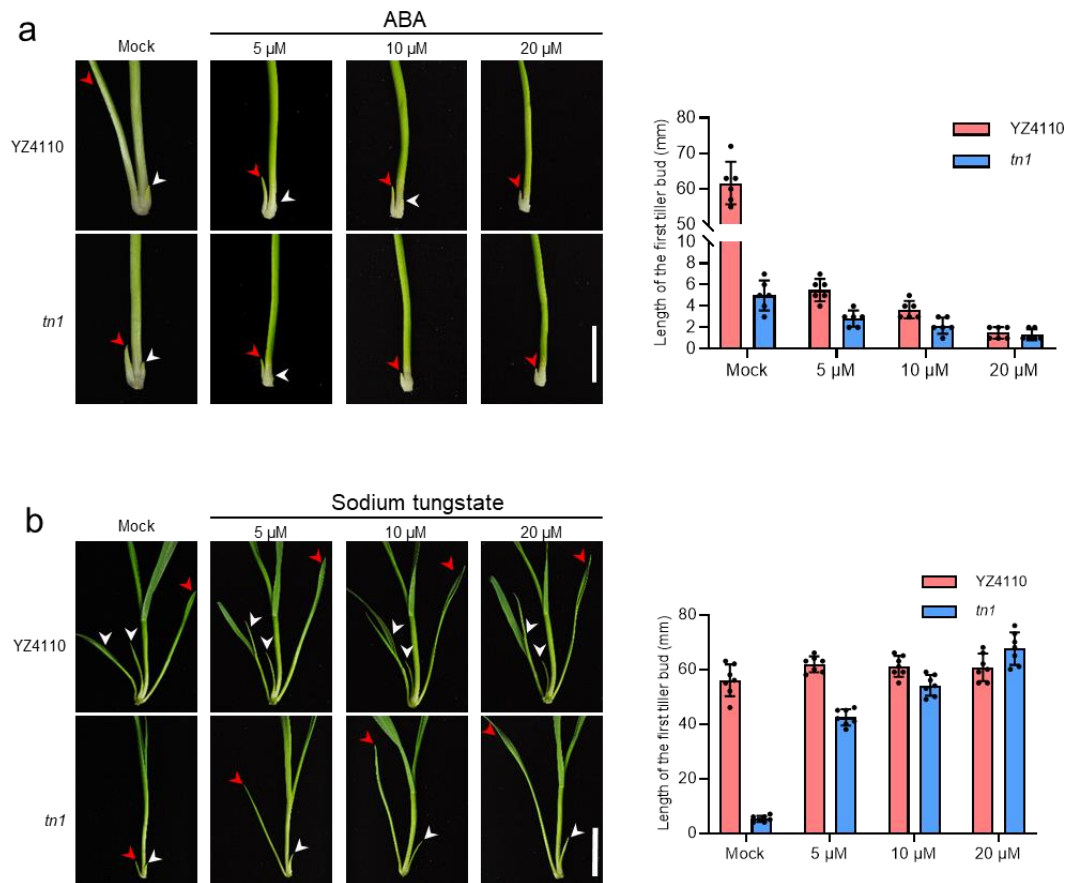

**Supplementary Fig. 17. Effects of ABA and sodium tungstate treatments on tiller bud outgrowth in YZ4110 and the *tn1* mutant.**

**a**, ABA application inhibits tiller bud outgrowth.  $n = 6$  independent plants for each treatment. **b**, The ABA biosynthesis inhibitor sodium tungstate partially rescues the low-tillering phenotype of the *tn1* mutant.  $n = 7$  independent plants for each treatment. Lengths of the first tiller buds (red arrows indicated) in **(a)** and **(b)** were measured. The white and red arrows indicate the presence of tiller buds. Data are means  $\pm$  SD. Scale bars, 1 cm in **(a)**, 2 cm in **(b)**. Source data are provided as a Source Data file.

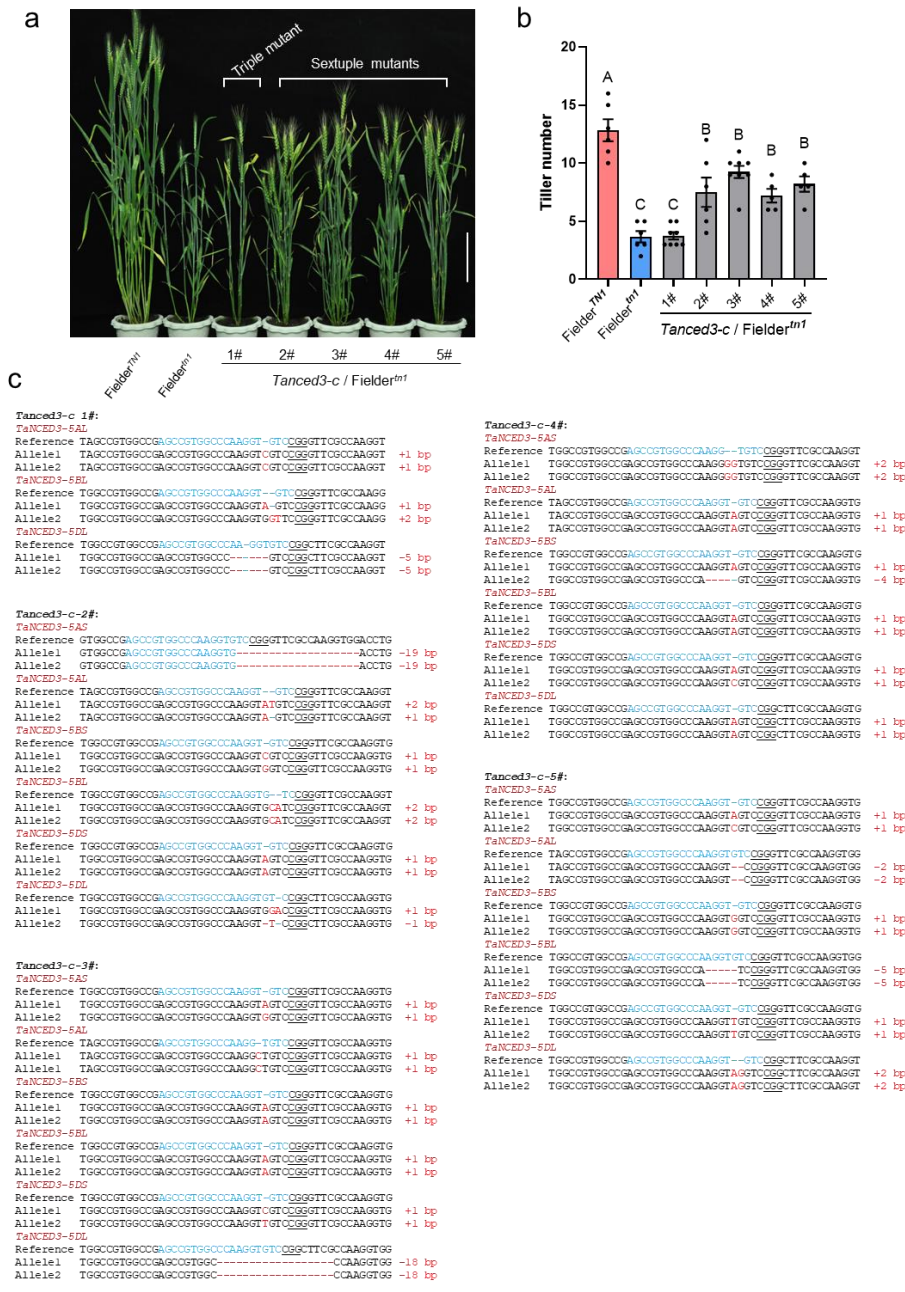

**Supplementary Fig. 18. Phenotypes of *Tanced3* mutants generated by CRISPR/Cas9 in the *Fielder<sup>tn1</sup>* background.**

**a, b** Representative phenotypes (**a**) and tiller number (**b**) of the *tn1* mutants generated by CRISPR/Cas9-mediated gene editing. The tiller numbers were measured from the T<sub>1</sub> generation transgenic lines at grain-filling stage. Scale bar, 15 cm in (**a**). Data in (**b**) are means ± SEM, Tiller numbers of *Fielder<sup>TN1</sup>* (*n* = 6), *Fielder<sup>tn1</sup>* (*n* = 6) and *Tanced3* mutants (*n* = 8/6/8/5/5) were measured at grain-filling stage from independent transgenic plants. Different letters indicate significant differences between groups, as determined by one way ANOVA with Duncan's multiple range tests (*p* < 0.01). **c** Genotype of the mutant lines. The target sites are marked in blue, and the PAM is underlined. The red letters indicate nucleotide insertions, and the red dashed lines represent nucleotide deletions. Source data underlying Supplementary Fig. 18a, b are provided as a Source Data file.

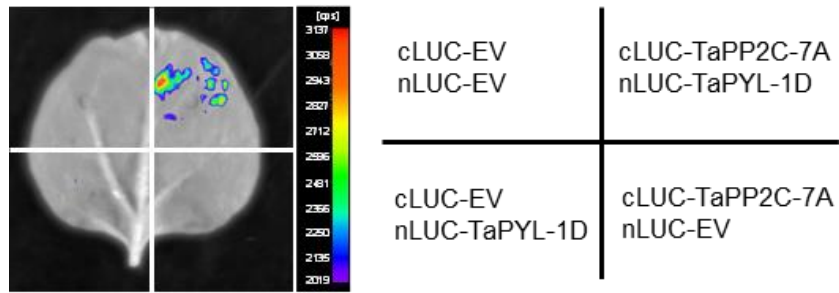

**Supplementary Fig. 19. Interaction between TaPP2C-7A and TaPYL-1D revealed by LCI assay.**

Luciferase complementation imaging (LCI) assays showing that TaPP2C-7A physically interacts with TaPYL-1D in *N. benthamiana* leaves. Source data are provided as a Source Data file.

**Supplementary Table 1. Genetic analysis of the *tn1* mutant.**

| Cross combination   | F <sub>1</sub> |            | F <sub>2</sub> |            | Ratio  | $\chi^2$ (3:1) | <i>p</i> value <sup>†</sup> |
|---------------------|----------------|------------|----------------|------------|--------|----------------|-----------------------------|
|                     | Wild type      | <i>tn1</i> | Wild type      | <i>tn1</i> |        |                |                             |
| YZ4110 / <i>tn1</i> | 5              | 0          | 315            | 116        | 2.72:1 | 0.842          | 0.3588                      |
| JM20 / <i>tn1</i>   | 46             | 0          | 8203           | 2952       | 2.78:1 | 12.7419        | 0.0004                      |

<sup>†</sup> The *p* values were determined by Chi-square ( $\chi^2$ ) goodness-of-fit tests, df = 1.

**Supplementary Table 2. Candidate genes predicted within the 352-kb region.**

| GENE_ID                   | Location                  | Uniprot ID        | FunctionalAnnotation_v1                            |
|---------------------------|---------------------------|-------------------|----------------------------------------------------|
| TraesCS6B02G012800        | 6B:8045847-8049871        | A0A3B6PFP1        | Myb family transcription factor-like protein       |
| TraesCS6B02G012900        | 6B:8123320-8129270        | A0A3B6PEA4        | Male sterility protein                             |
| TraesCS6B02G015600LC      | 6B:8134089-8134577        | No BLAST hits     | Amiloride sensitive sodium channel subunit gamma   |
| TraesCS6B02G015700LC      | 6B:8136084-8136398        | No BLAST hits     | CREA_PSEPU Creatinase                              |
| TraesCS6B02G013000        | 6B:8138326-8140897        | A0A3B6PEF5        | Ankyrin repeat family protein                      |
| <b>TraesCS6B02G013100</b> | <b>6B:8234408-8236549</b> | <b>A0A3B6PD15</b> | <b>Ankyrin repeat family protein</b>               |
| TraesCS6B02G015800LC      | 6B:8244047-8244994        | No BLAST hits     | RNA directed DNA polymerase                        |
| TraesCS6B02G015900LC      | 6B:8320567-8321582        | No BLAST hits     | Retrovirus related Pol polyprotein from transposon |
| TraesCS6B02G016000LC      | 6B:8341233-8342490        | No BLAST hits     | Calmodulin binding transcription activator         |
| TraesCS6B02G016100LC      | 6B:8370169-8371427        | No BLAST hits     | Calmodulin binding transcription activator         |
| TraesCS6B02G013200        | 6B:8372877-8375684        | A0A3B6PG38        | Disease resistance protein (NBS-LRR CLASS) FAMILY  |
| TraesCS6B02G013300        | 6B:8385071-8389993        | A0A3B6PFP6        | Disease resistance protein (NBS-LRR CLASS) FAMILY  |

## Supplementary reference

<sup>1</sup> Waddington, S.R., Cartwright, P.M. & Wall, P.C. A quantitative scale of spike initial and pistil development in barley and wheat. *Ann. Bot.* **51**, 119-130 (1983).
